# Supplementary material
Source: Frontiers journal article supplement (https://www.frontiersin.org/articles/430622)
Supplement: Data_Sheet_1.PDF [file Data_Sheet_1.PDF]

## **SUPPLEMENTARY INFORMATION**

### **Conditional silencing by CRISPRi reveals the role of DNA gyrase in formation of drug-tolerant persister population in *Mycobacterium tuberculosis***

Eira Choudhary<sup>1,2</sup>, Rishabh Sharma<sup>1</sup>, Yashwant Kumar<sup>1</sup> and Nisheeth Agarwal<sup>1</sup>

Key words: *Mycobacterium tuberculosis*; Gyrase, DNA damage; SOS, Persisters

Running Title: Suppression of DNA gyrase induces persisters in *M. tuberculosis*

\*To whom the correspondence should be addressed

Affiliation:

<sup>1</sup>Translational Health Science and Technology Institute,  
NCR Biotech Science Cluster,  
3rd Milestone, Faridabad–Gurgaon Expressway,  
Faridabad- 121001 (Haryana)

<sup>2</sup>Symbiosis School of Biomedical Sciences,  
Symbiosis International University,  
Lavale,  
Pune- 412115, (Maharashtra)

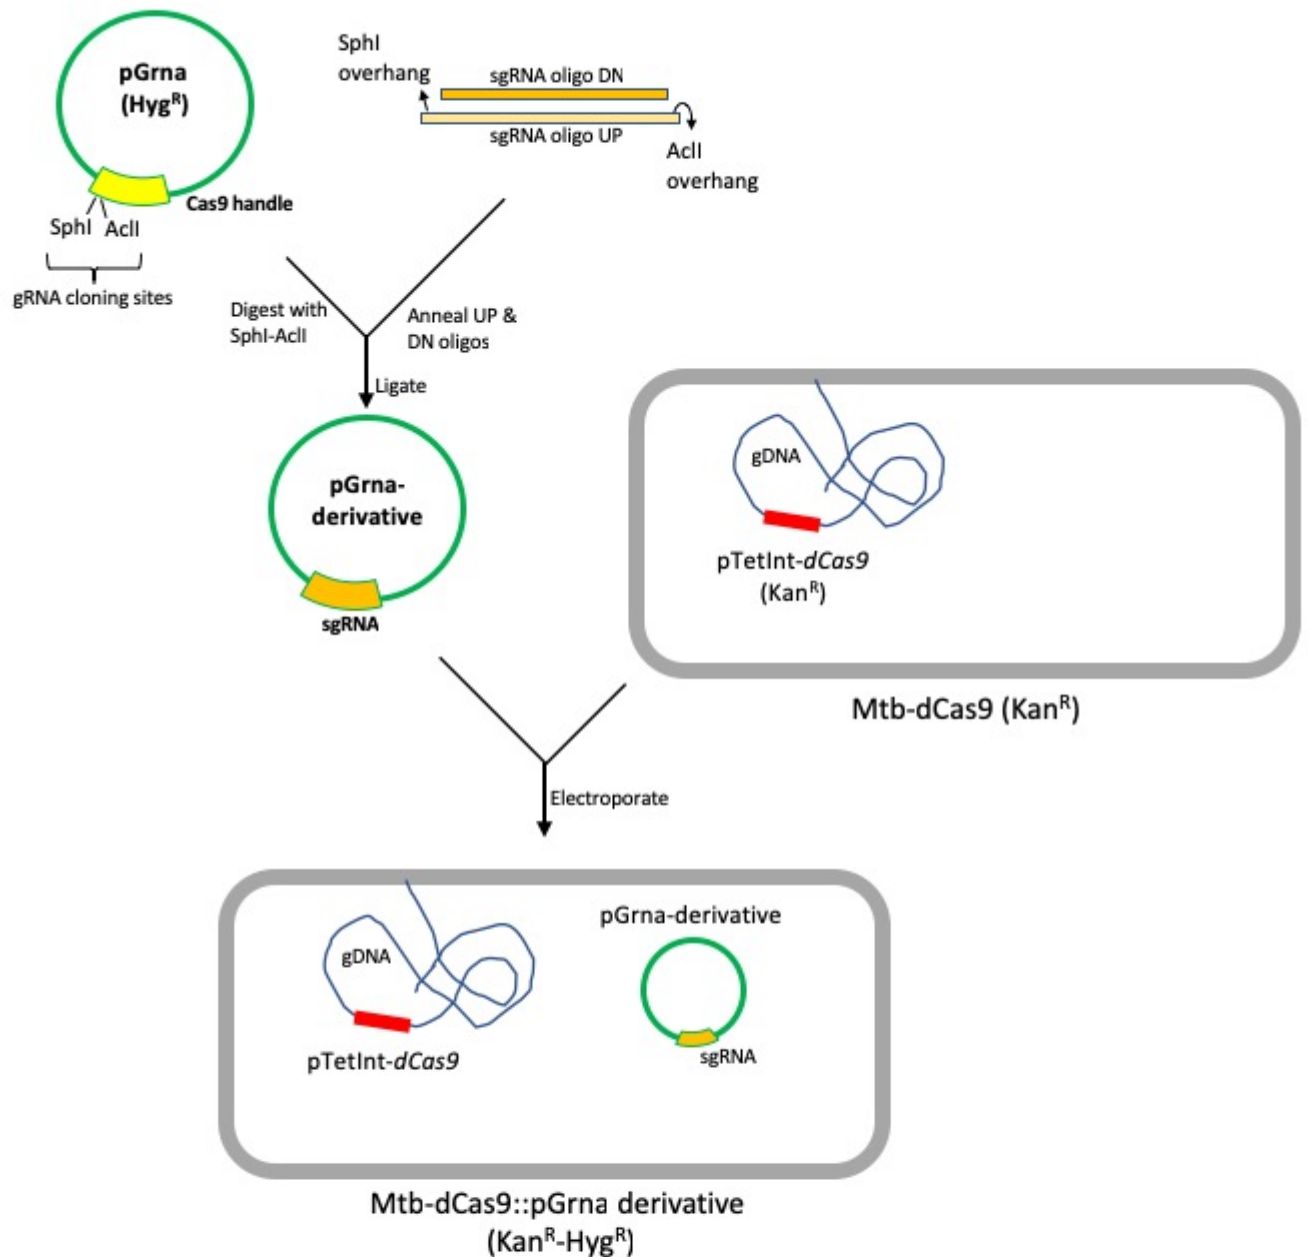

**Figure S1: Schematic of construction of CRISPRi-based genetic knockdown strain in Mtb.** Target-specific complementary oligonucleotides were designed such that after annealing they bear SphI and AclI overhangs. The annealed oligos were cloned at SphI-AclI sites, downstream to Tetracycline-inducible promoter and adjacent to Cas9 handle and Terminator in Hyg<sup>R</sup> replicative plasmid pGrna. The recombinant derivative of pGrna was subsequently electroporated in Mtb harboring Kan<sup>R</sup> integrative plasmid pTetInt-*dcas9* and colonies were selected on 7H11-Kan-Hyg. The resulting strain was treated with ATc to achieve desired level of suppression of target gene.

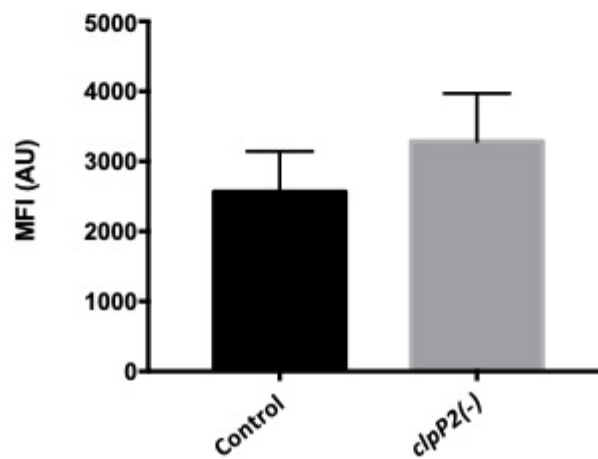

**Figure S2: Effect of *clpP2* suppression in *Mtb* on nucleoid condensation.** Median fluorescence intensity (MFI) of DAPI-stained bacteria was obtained by FACS which shows negligible difference ( $P= 0.07$  by paired Student's t-test) in the nucleoid status between the control and the *clpP2*(-) strains. Values were obtained from 10000 events using FlowJo software (FlowJo LLC). Error bars represent SD from at least 3 replicates.

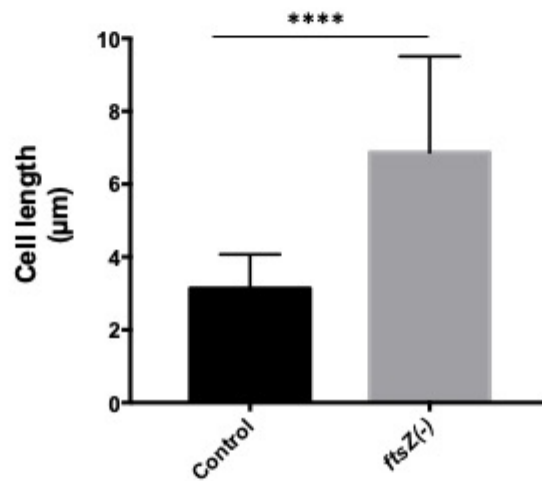

**Figure S3: Genetic suppression of *ftsZ* adversely affects cell division of Mtb.** Cell length of control and *ftsZ*(-) was determined under light microscopy using 100x oil objective. Shown are the mean cell lengths of ~300 cells from three different experiments. Statistical significance is determined by paired Student's t-test: \*\*\*\*  $P < 0.0001$ .

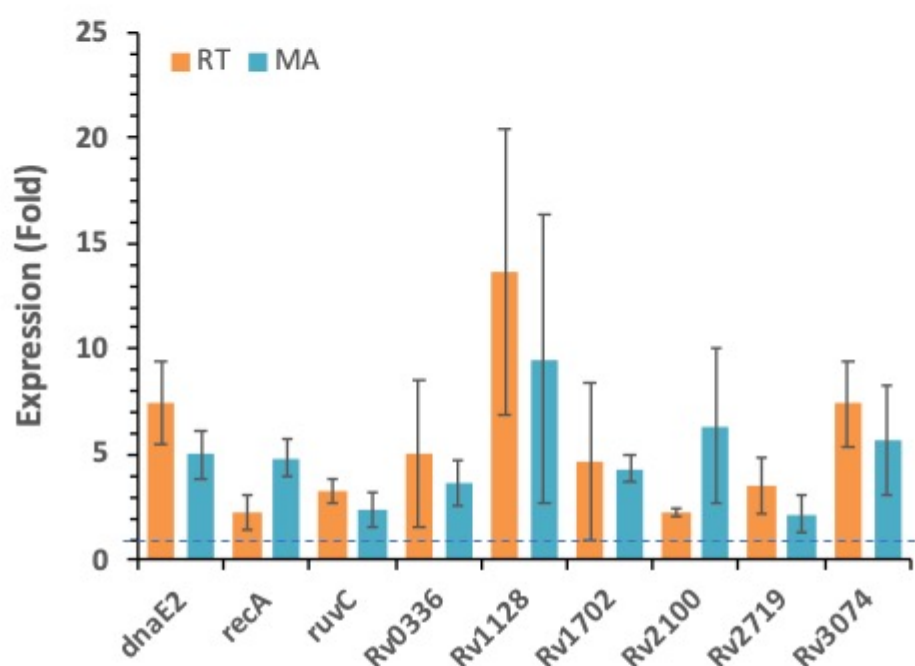

**Figure S4: Verification of microarray data by quantitative real time reverse transcription PCR.** Quantitative real time reverse transcription PCR (RT) was performed to analyze the change in expression status of LexA-regulons upon gyrase depletion, and compare with microarray (MA). Fold expression of a gene in ATc-treated bacteria relative to ATc untreated control was estimated after normalization with *sigA* levels under each condition. Error bars represent SD from 2 biological and 2 technical replicates. Statistical significance is determined by paired Student's t-test:  $P \leq 0.05$ . Broken line demarcates the base line.

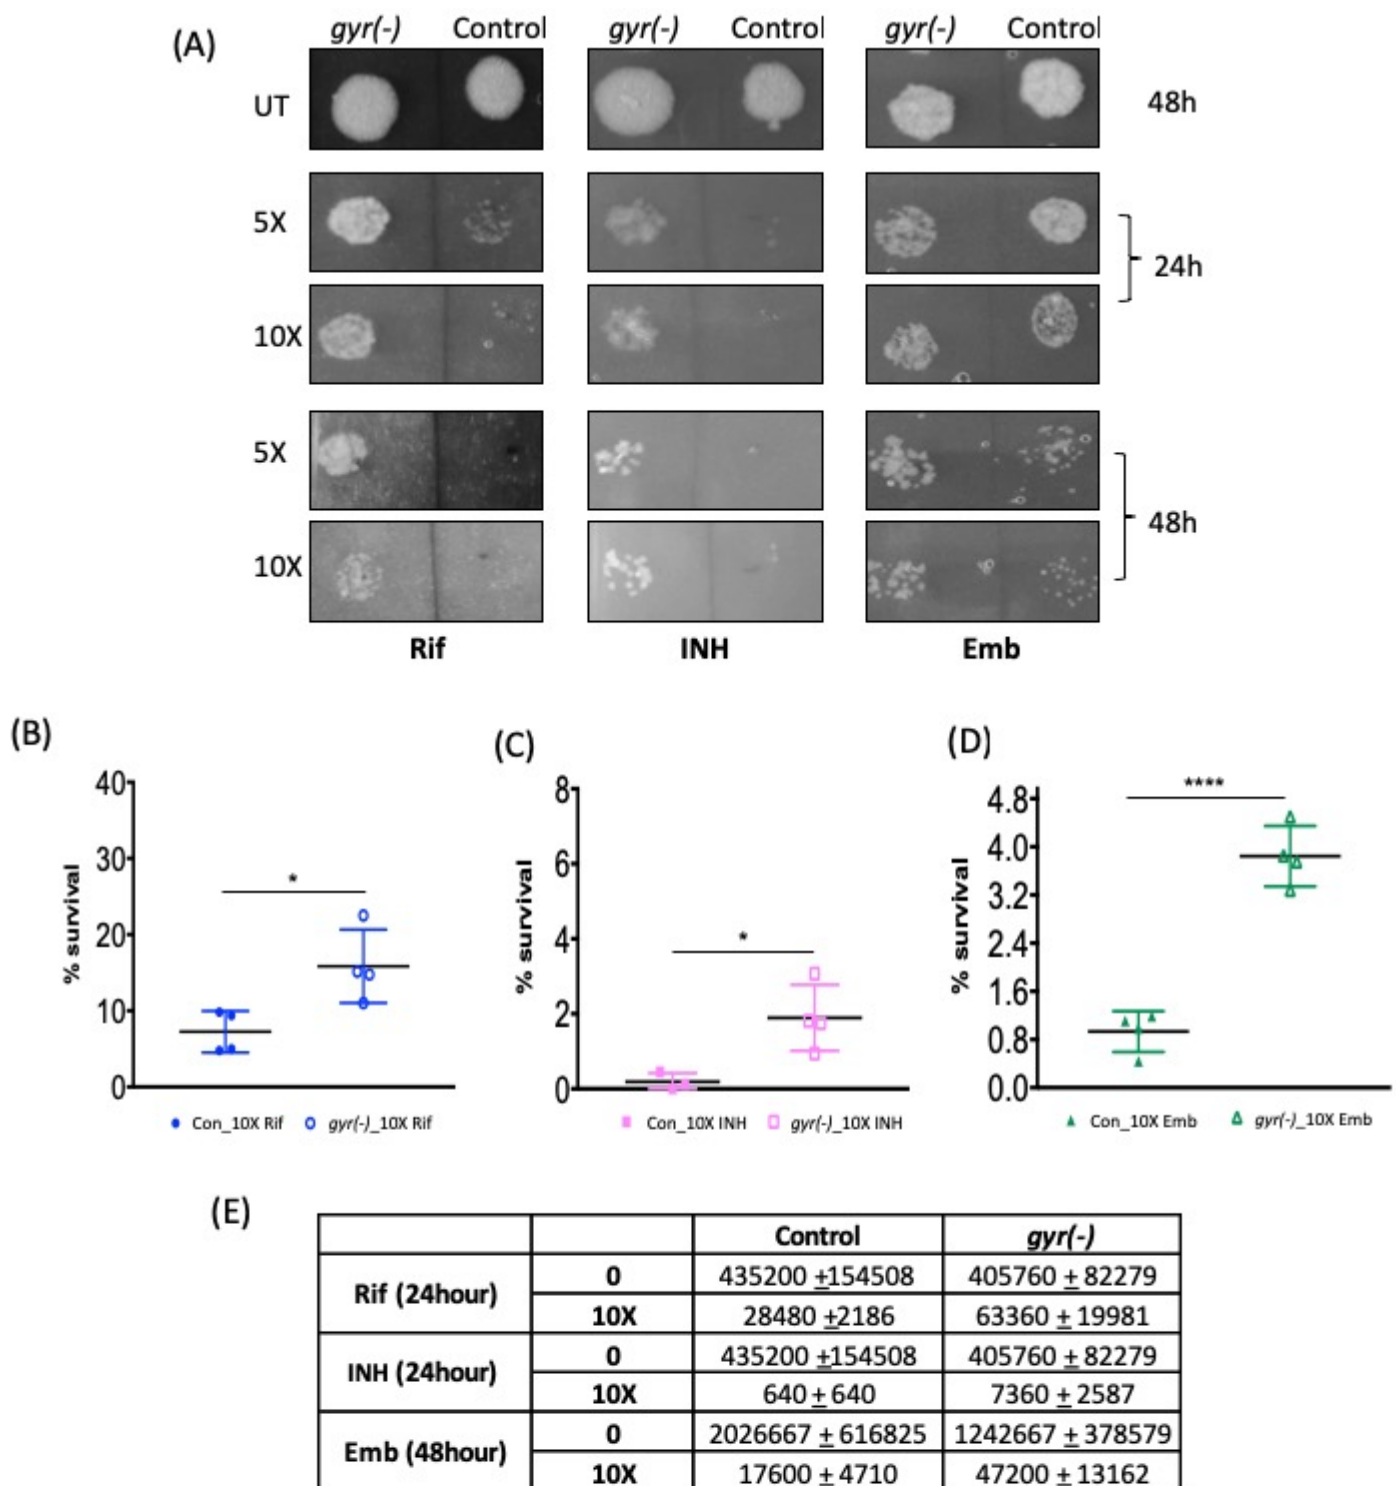

**Figure S5: Effect of DNA gyrase suppression on susceptibility of *Mtb* to antibiotics.** A) Analysis of *in vitro* antibiotic susceptibility of control and *gyr*(-) strains by spotting. *Mtb* cultures, untreated (UT) or treated with varying concentrations of drugs for different durations were spotted on 7H11 agar plates and growth was monitored after 4 weeks of incubation at 37°C. (B-D) Analysis of *in vitro* antibiotic susceptibility of control and *gyr*(-) strains of *Mtb* after passaging of cultures. Shown are the effects of 10x MIC of Rif (B), INH (C) after 24hours, and Emb (D) after 48hours of treatment. Antibiotic susceptibility was determined typically as described in Fig. 4. Survival is expressed as percentage survival in treated relative to drug-untreated cultures. (E) CFU analysis of bacteria after drug treatment of passaged cultures. Statistical significance is determined by Student's t-test: \*  $P < 0.05$ , \*\*\*\*  $P < 0.0001$ . Image is representative of 3 experiments in (A). Data represent average of values from at least 3 experiments in (B-E).

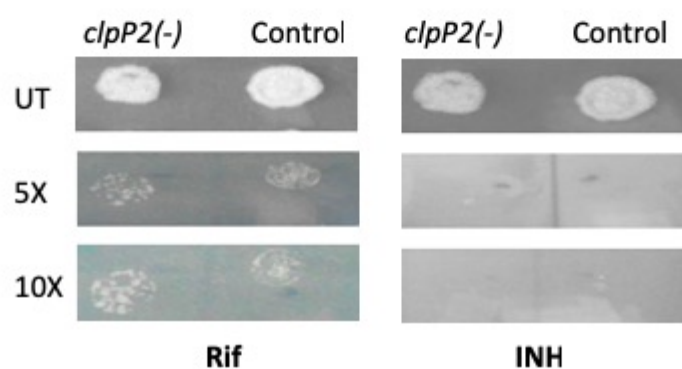

**Figure S6: Effect of *clpP2* suppression on susceptibility of Mtb to antibiotics.** Analysis of *in vitro* antibiotic susceptibility of control and *clpP2*(-) strains by spotting. Mtb cultures, untreated (UT) or treated with varying concentrations of Rif and INH for 24hours were spotted on 7H11 agar plates and growth was monitored after 4 weeks of incubation at 37°C. Image is representative of 3 experiments.



(A)

|     | MIC <sub>99</sub> (μg/ml) |                |
|-----|---------------------------|----------------|
|     | Control                   | <i>gyr</i> (-) |
| Rif | 0.062                     | 0.062          |
| INH | 0.125                     | 0.125          |
| Emb | 8                         | 8              |

(B)

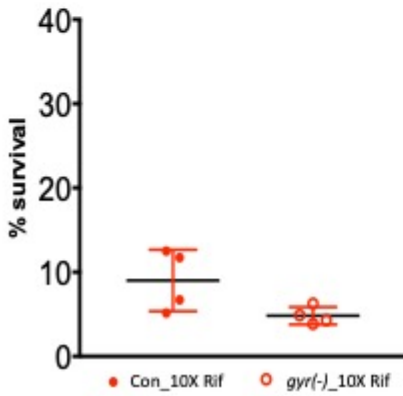

(C)

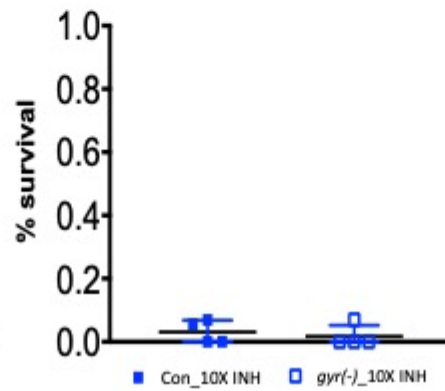

(D)

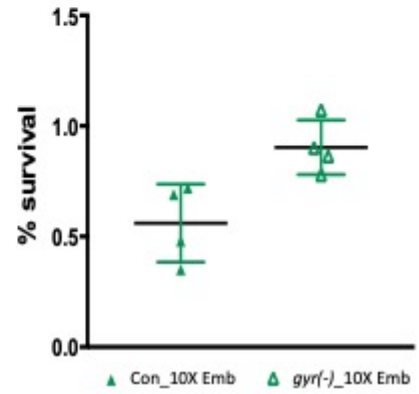

(E)

|               |     | Control           | <i>gyr</i> (-)   |
|---------------|-----|-------------------|------------------|
|               |     |                   |                  |
| Rif (24hours) | 0   | 524800 ± 110723   | 939520 ± 338424  |
|               | 10X | 47520 ± 22527     | 44800 ± 15289    |
| INH (24hours) | 0   | 524800 ± 110723   | 939520 ± 338424  |
|               | 10X | 320 ± 0           | 480 ± 0          |
| Emb (48hours) | 0   | 4576000 ± 1862202 | 3429333 ± 877416 |
|               | 10X | 23600 ± 6581      | 30800 ± 7770     |

**Figure S7: Susceptibility of ATc-untreated cultures to antibiotics.** (A) MIC<sub>99</sub> determination of antibiotics against ATc-untreated control and *gyr*(-) strains from the passaged cultures. MIC was determined by microtiter broth dilution, as mentioned in materials and methods. (B-D) *In vitro* antibiotic susceptibility of ATc-untreated cultures of control and *gyr*(-). Shown are the effects of 10x MIC of Rif (B), INH (C) after 24hours, and Emb (D) after 48hours of treatment. Antibiotic susceptibility was determined typically as described in Fig. 4. Survival is expressed as percentage survival in treated relative to drug-untreated cultures. (E) CFU analysis of ATc-untreated cultures of control and *gyr*(-) after drug treatment. Statistical analysis by Student's t-test shows no difference in survival of Rif and INH treated bacteria. Data represent average of values from at least 3 experiments in (A-E).



**Table S1: List of oligonucleotides.**

| S. No. | Primer | Sequence (5'-3')            | Reference                                                |
|--------|--------|-----------------------------|----------------------------------------------------------|
| 1.     | Pr1    | GTGCATGCGGTTGAGTCGCCG       | This study (for cloning of <i>gyrB</i> specific sgRNAs)  |
| 2.     | Pr2    | CGCGGCGACTCAACCGCATGCACCATG |                                                          |
| 3.     | Pr3    | GGA CTCTTGACCCGAAG          | This study (for cloning of <i>clpP2</i> specific sgRNAs) |
| 4.     | Pr4    | CGCTTCGGGGTCAAGGAGTCCCATG   |                                                          |
| 5.     | Pr5    | CCACGACCTTGATGACGGC         | This study (for cloning of <i>ftsZ</i> specific sgRNAs)  |
| 6.     | Pr6    | CGGCCGTCATCAAGGTCGTGGCATG   |                                                          |
| 7.     | Pr7    | ACGCCGGGTATTCGGAGTCG        | This study (for qRT-PCR analysis of <i>gyrB</i> )        |
| 8.     | Pr8    | CTGCGGTTCTGCTGACCTTCACC     |                                                          |
| 9.     | Pr9    | ACTGATCGTCGGATCCCAGG        | This study (for qRT-PCR analysis of <i>gyrA</i> )        |
| 10.    | Pr10   | CAATGTTGGAAATGCCGGCC        |                                                          |
| 11.    | Pr11   | AAAAGGGTAAGCCGCGCTACG       | This study (for qRT-PCR analysis of <i>dnaE2</i> )       |
| 12.    | Pr12   | ATGATGGGTCAGCTCGATGC        |                                                          |
| 13.    | Pr13   | GTTACGGCAAAGGTTTCGGTGATGC   | This study (for qRT-PCR analysis of <i>recA</i> )        |
| 14.    | Pr14   | ATGAACGCCGCAACACCACC        |                                                          |
| 15.    | Pr15   | GGCTGTCGCTTATCGAGAGTGG      | This study (for qRT-PCR analysis of <i>ruvC</i> )        |
| 16.    | Pr16   | GCTGAGAGAACACCCGTTTCG       |                                                          |
| 17.    | Pr17   | TGATGAGCGGTTTGAATGCC        | This study (for qRT-PCR analysis of <i>Rv0336</i> )      |
| 18.    | Pr18   | TGTCCATCACCCACTCCTCG        |                                                          |
| 19.    | Pr19   | GTGTTCCACTCGGGAGGAGATCACG   | This study (for qRT-PCR analysis of <i>Rv1128</i> )      |
| 20.    | Pr20   | TCCTCGGTGGATTGTTCCGCC       |                                                          |
| 21.    | Pr21   | ATGTATTCGAGTAGCCGGGAGG      | This study (for qRT-PCR analysis of <i>Rv1702</i> )      |
| 22.    | Pr22   | CGAGTTTGTGATGAAGGGG         |                                                          |
| 23.    | Pr23   | TCGGTGGCCGCTACTAGTATCG      | This study (for qRT-PCR analysis of <i>Rv2100</i> )      |
| 24.    | Pr24   | AGAAGTCACACGCCCAGTCG        |                                                          |
| 25.    | Pr25   | ATGTCGAGGACTGGGCATGG        | This study (for qRT-PCR analysis of <i>Rv2719</i> )      |
| 26.    | Pr26   | ACGTCATACAGGGACTCCCC        |                                                          |
| 27.    | Pr26   | CGAGACATTGACCGCGATCG        | This study (for qRT-PCR analysis of <i>Rv3074</i> )      |
| 28.    | Pr27   | TGAATCTCGTCGAGCCAGGG        |                                                          |
